# Supplementary material for: A combined stopped-flow, electrospray ionization mass spectrometry and31P NMR study on the acetic acid-mediated fragmentation of the hydroxo-chalcogenide cluster [W3Se4(OH)3(dmpe)3]+(dmpe = 1,2-bis(dimethylphosphanyl)ethane) to yield the dinuclear [W2Se2(µ-Se)2(µ-CH3CO2)(dmpe)2]+complex
Source: Royal Society of Chemistry journal article supplement (doi:10.1039/b611274a), 2006-01-01
Supplement: b611274a.pdf [file b611274a.pdf]

## A Combined Stopped-Flow, Electrospray Ionization Mass

### Spectrometry and $^{31}\text{P}$ NMR study on the Acetic Acid-Mediated

### Fragmentation of the Hydroxo-Chalcogenide Cluster

$[\text{W}_3\text{Se}_4(\text{OH})_3(\text{dmpe})_3]^+$  (dmpe = 1, 2-bis(dimethylphosphanyl)ethane) to yield the dinuclear  $[\text{W}_2\text{Se}_2(\mu\text{-Se})_2(\mu\text{-CH}_3\text{CO}_2)(\text{dmpe})_2]^+$  complex.

Andrés G. Algarra<sup>a</sup>, Manuel G. Basallote<sup>\*, a</sup>, C. Esther Castillo<sup>a</sup>, Carolina Corao<sup>b</sup>, Rosa Llusar<sup>\*, b</sup>, M. Jesús Fernández-Trujillo<sup>a</sup>, Cristian Vicent<sup>b</sup>

<sup>a</sup>Departamento de Ciencia de los Materiales e Ingeniería Metalúrgica y Química Inorgánica, Facultad de Ciencias, Universidad de Cádiz, Apartado 40, Puerto Real, 11510 Cádiz, Spain.

<sup>b</sup>Departament de Ciències Experimentals, Universitat Jaume I, Campus de Riu Sec, Box 224, 12071 Castelló, Spain. Fax: +34 964 728066; Tel: +34 964 728086

Contents:

**Figure 1S, 2S.** ESI-MS/MS for species generated from  $[\text{W}_3\text{Se}_4(\text{OH})_3(\text{dmpe})_3]^+$  ( $[\mathbf{1}]^+$ ).

**Figure 3S, 4S.** ESI-MS/MS for species generated from  $[\text{W}_3\text{Se}_4(\text{OH})_2(\text{CH}_3\text{CO}_2)(\text{dmpe})_3]^+$  ( $[\mathbf{1}_1]^+$ ).

**Figure 5S.** ESI-MS/MS for species generated from  $[\text{W}_3\text{Se}_4(\text{OH})(\text{CH}_3\text{CO}_2)_2(\text{dmpe})_3]^+$  ( $[\mathbf{1}_2]^+$ ).

**Figure 6S.** ESI-MS/MS for species generated from  $[\text{W}_2\text{Se}_2(\mu\text{-Se})_2(\mu\text{-CH}_3\text{CO}_2)(\text{dmpe})_2]^+$  ( $[\mathbf{2}]^+$ ).

ESI-MS/MS for species generated from  $[\text{W}_3\text{Se}_4(\text{OH})_3(\text{dmpe})_3]^+$  ( $[\mathbf{1}]^+$ ).

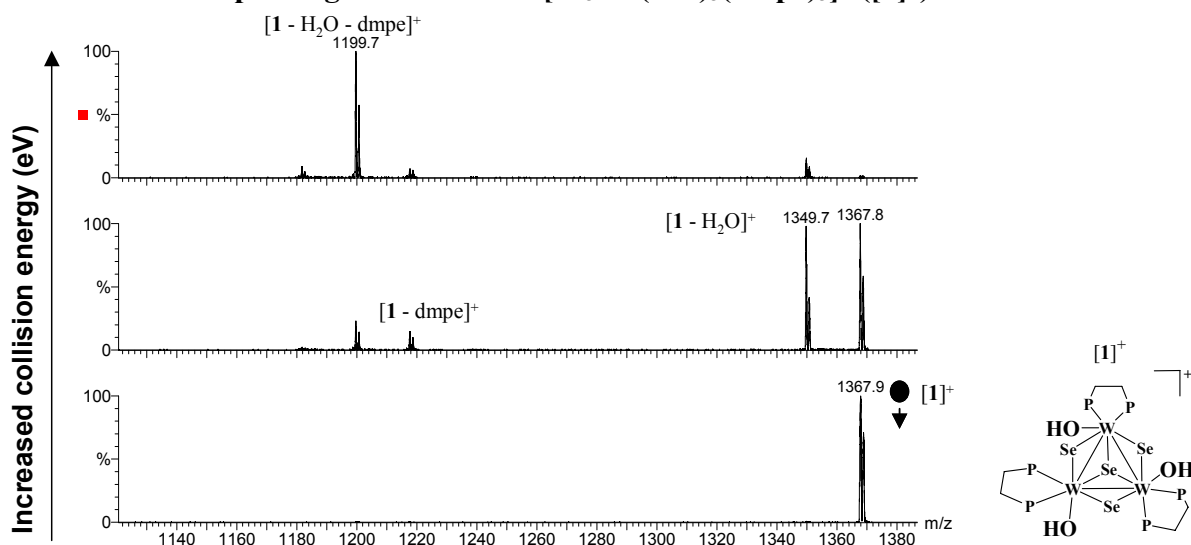

Figure 1S, ESI-MS/MS for species  $[\text{W}_3\text{Se}_4(\text{OH})_3(\text{dmpe})_3]^+$  ( $[\mathbf{1}]^+$ ).

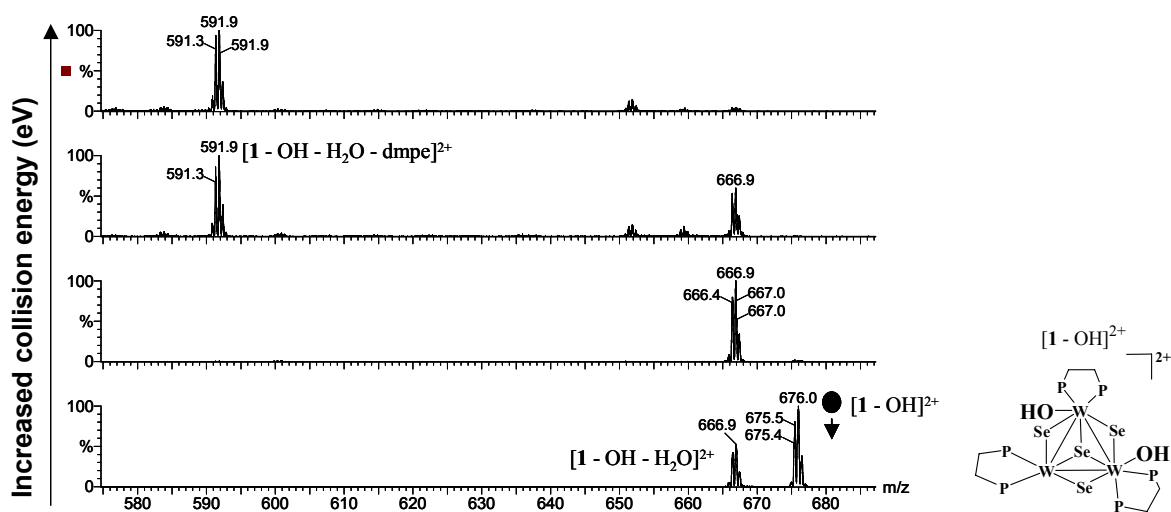

Figure 2S, ESI-MS/MS for species  $[\text{W}_3\text{Se}_4(\text{OH})_2(\text{dmpe})_3]^{2+}$  ( $[\mathbf{1} - \text{OH}]^{2+}$ ).

ESI-MS/MS for species generated from  $[\text{W}_3\text{Se}_4(\text{OH})_s(\text{CH}_3\text{CO}_2)(\text{dmpe})_3]^+$  ( $[\text{I}_1]^+$ ).

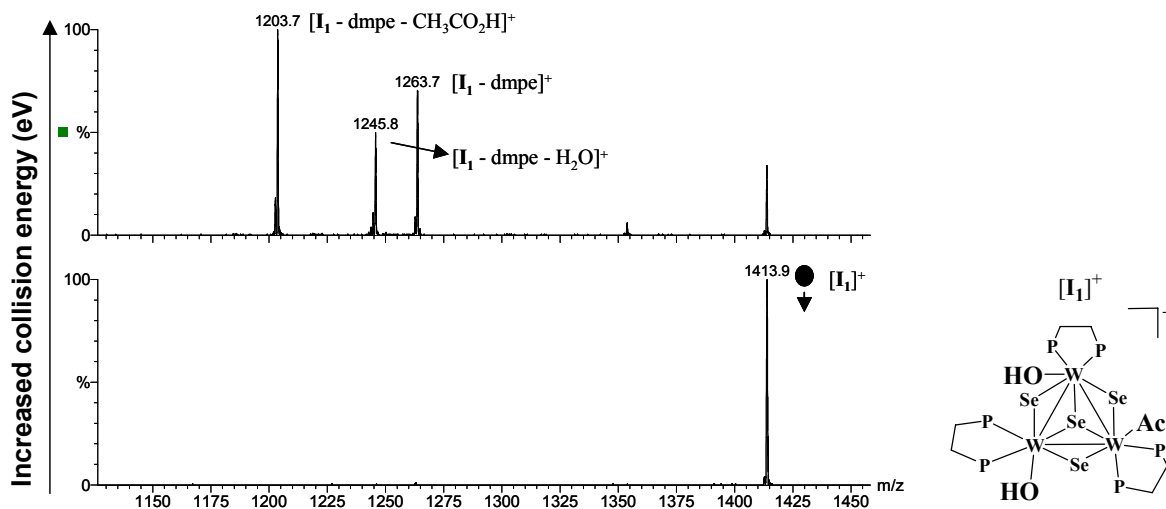

Figure 3S. ESI-MS/MS for species  $[\text{W}_3\text{Se}_4(\text{OH})_2(\text{CH}_3\text{CO}_2)(\text{dmpe})_3]^+$  ( $[\text{I}_1]^+$ ).

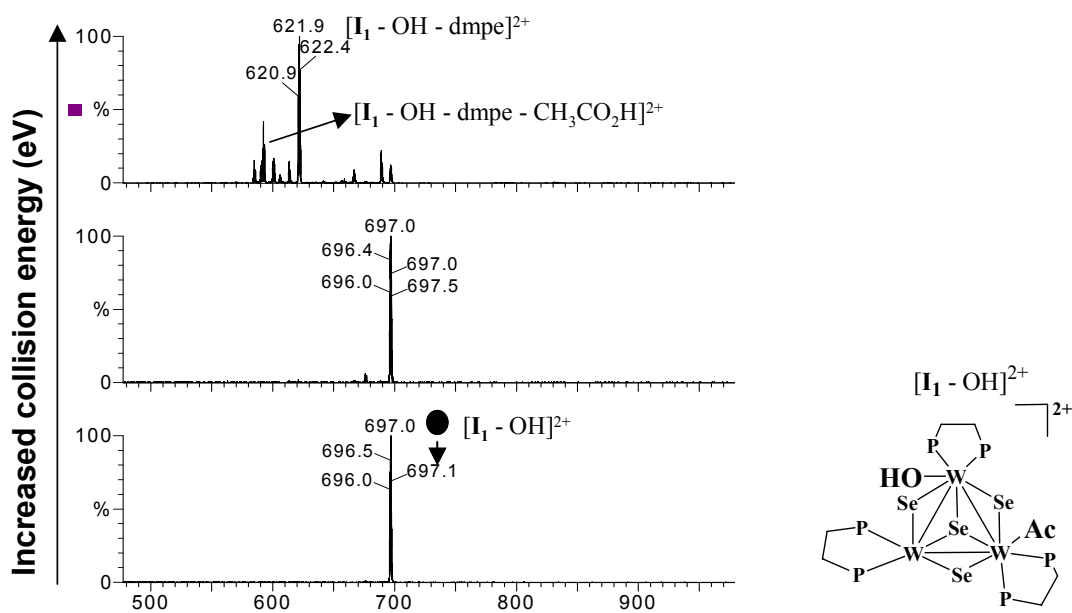

Figure 4S. ESI-MS/MS for species  $[\text{W}_3\text{Se}_4(\text{OH})(\text{CH}_3\text{CO}_2)(\text{dmpe})_3]^{2+}$  ( $[\text{I}_1 - \text{OH}]^+$ ).

ESI-MS/MS for species generated from  $[\text{W}_3\text{Se}_4(\text{OH})(\text{CH}_3\text{CO}_2)_2(\text{dmpe})_3]^+$  ( $[\text{I}_2]^+$ ).

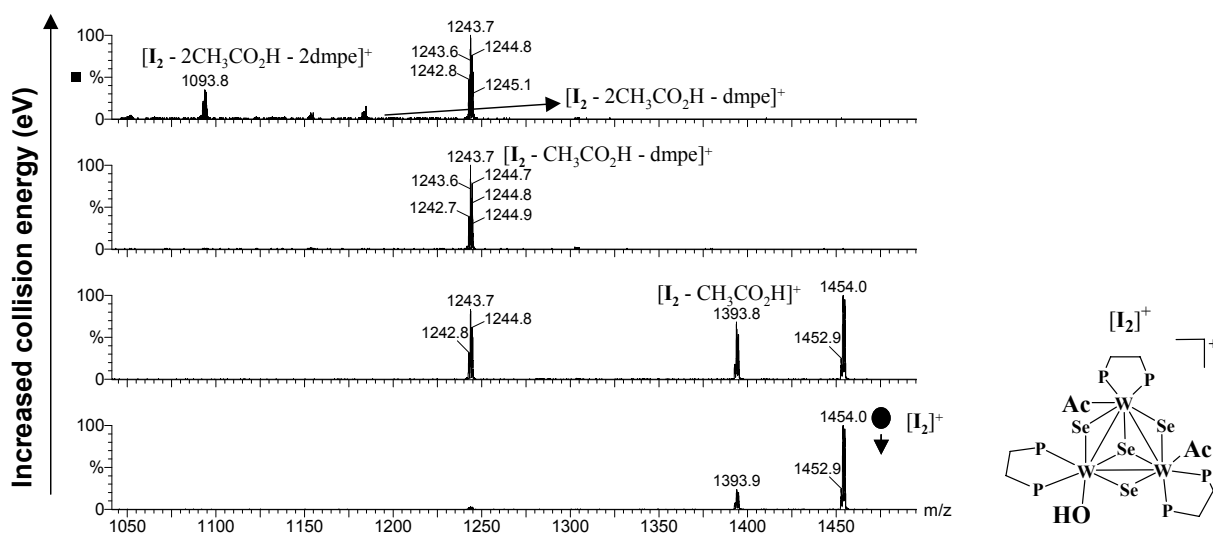

Figure 5S ESI-MS/MS for species  $[\text{W}_3\text{Se}_4(\text{OH})(\text{CH}_3\text{CO}_2)_2(\text{dmpe})_3]^+$  ( $[\text{I}_2]^+$ ).

ESI-MS/MS for species generated from  $[\text{W}_2\text{Se}_2(\mu\text{-Se})_2(\mu\text{-CH}_3\text{CO}_2)(\text{dmpe})_2]^+$  ( $[\text{2}]^+$ ).

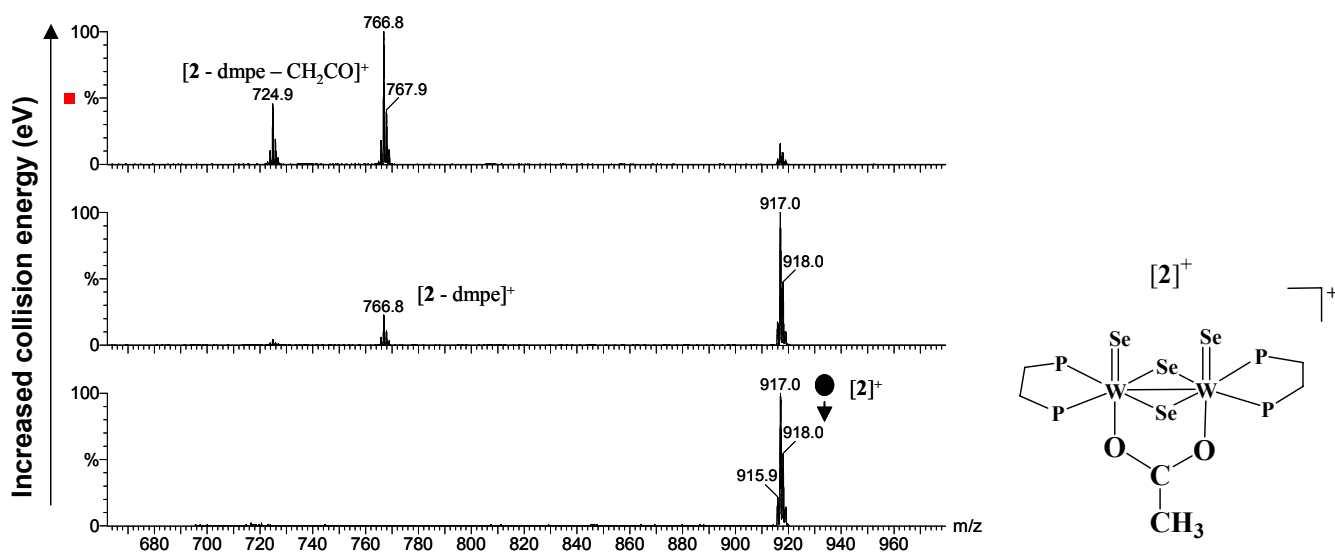

Figure 6S ESI-MS/MS for species  $[\text{W}_2\text{Se}_2(\mu\text{-Se})_2(\mu\text{-CH}_3\text{CO}_2)(\text{dmpe})_2]^+$  ( $[\text{2}]^+$ ).
